# Supplementary material
Source: PubMed Central journal article supplement (PMC3769420)
Supplement: NIHMS486800-supplement-1.pdf [file NIHMS486800-supplement-1.pdf]

## Supplementary Information

### **FGF21 regulates circadian behavior and metabolism by acting on the nervous system**

Angie L. Bookout<sup>1,2</sup>, Marleen H. M. de Groot<sup>3,4</sup>, Bryn M. Owen<sup>1</sup>, Syann Lee<sup>2</sup>, Laurent Gautron<sup>2</sup>, Heather L. Lawrence<sup>1</sup>, Xunshan Ding<sup>4</sup>, Joel K. Elmquist<sup>2</sup>, Joseph S. Takahashi<sup>3,4</sup>, David J. Mangelsdorf<sup>1,4\*</sup>, and Steven A. Kliewer<sup>1,5\*</sup>

<sup>1</sup>Department of Pharmacology; <sup>2</sup>Department of Internal Medicine, Division of Hypothalamic Research; <sup>3</sup>Department of Neuroscience; <sup>4</sup>Howard Hughes Medical Institute; <sup>5</sup>Department of Molecular Biology, University of Texas Southwestern Medical Center, Dallas TX 75390, USA

\*To whom correspondence should be addressed. Email:

[davo.mango@utsouthwestern.edu](mailto:davo.mango@utsouthwestern.edu); [steven.kliewer@utsouthwestern.edu](mailto:steven.kliewer@utsouthwestern.edu)

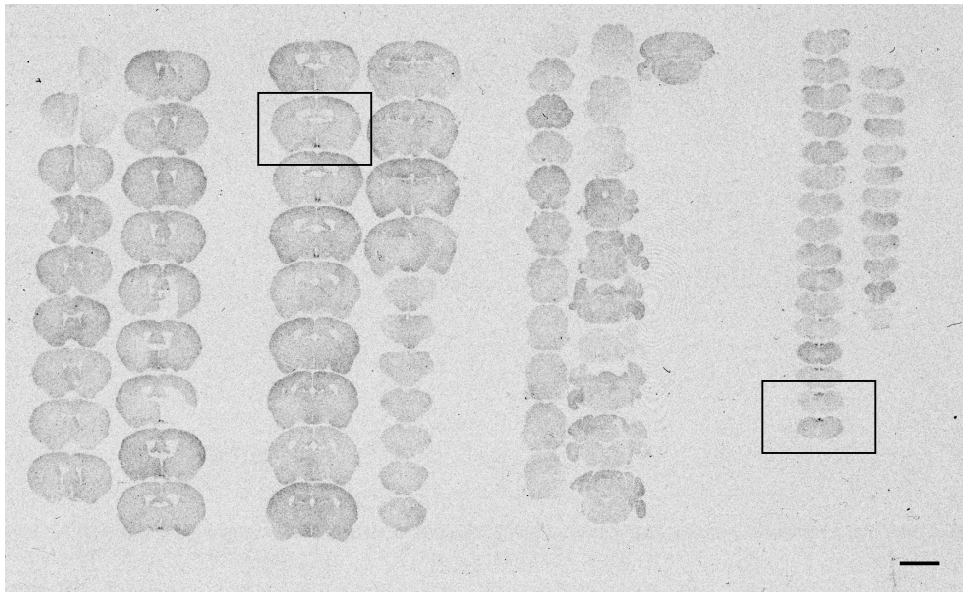

**Supplementary Figure 1**  $\beta$ -Klotho in situ hybridization across the mouse brain. Mouse brain coronal sections (25  $\mu$ m, 1:4 series) were subjected to free-floating in situ hybridization with a  $^{33}$ P-labeled antisense riboprobe for *Klb* and mounted onto slides in rostral (top left) to caudal (bottom right) order. Boxed areas indicate regions shown in **Figure 1**. Bar = 45 mm.

### a Plasma Analytes

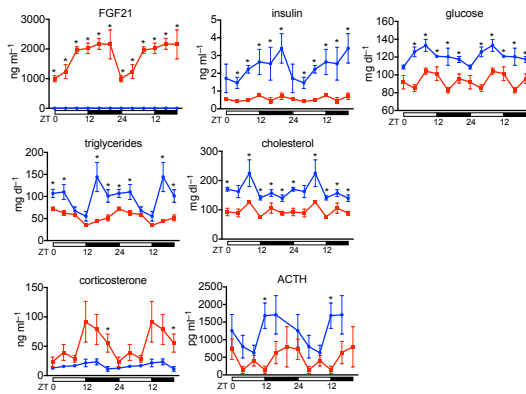

### b Hypothalamus Gene Expression

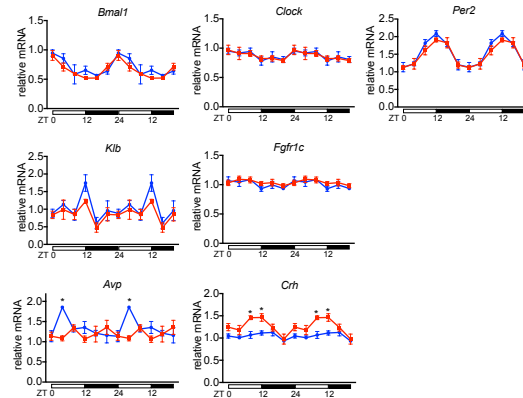

### c Liver Gene Expression

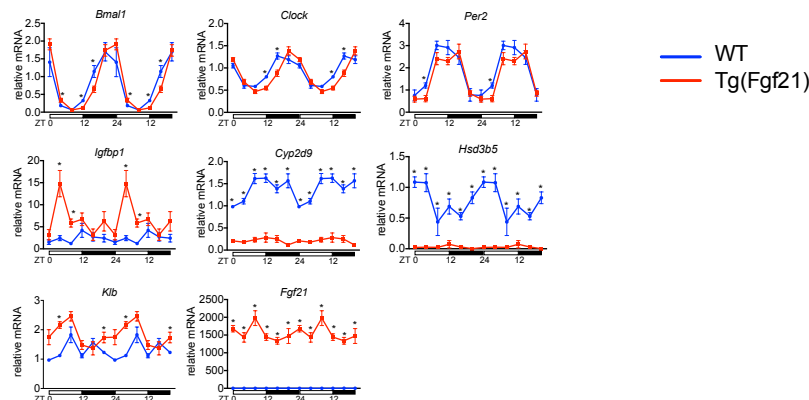

**Supplementary Figure 2** Circadian profiles of gene expression and plasma analytes in Tg(Fgf21) mice. Male wild-type (WT) or Tg(FGF21) mice were sacrificed every 4 h over a 24 h period, beginning at the start of the light phase (ZT0). **(a)** Plasma hormones and metabolites. **(b)** Hypothalamic clock, FGF21 receptor, and neuropeptide gene expression. Arginine vasopressin (*Avp*); Corticotropin releasing hormone (*Crh*). **(c)** Liver clock, growth hormone pathway, and FGF21 signaling pathway gene expression. Values on the x-axes are double-plotted; data represent mean  $\pm$  SEM,  $n = 3-6$ . Asterisks indicate significant differences ( $P < 0.05$ ) between WT and Tg(Fgf21).

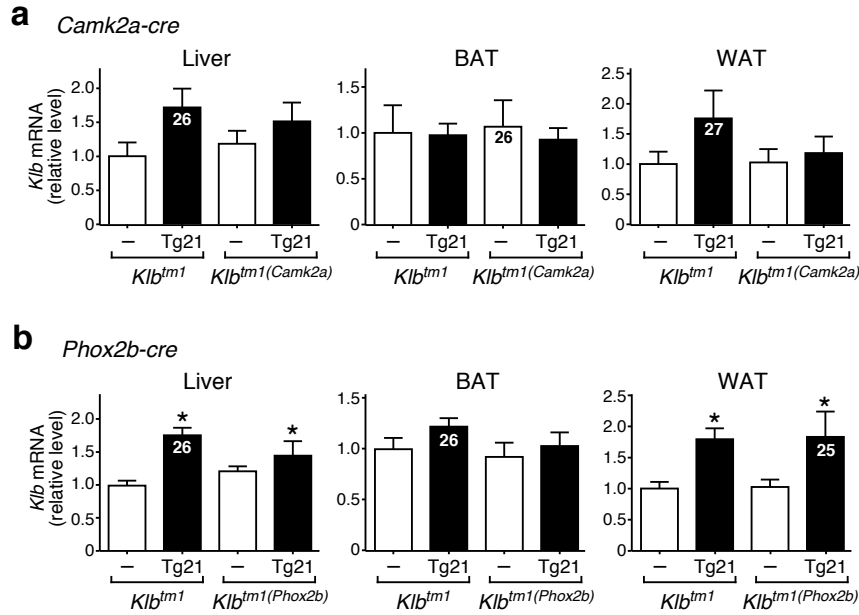

**Supplementary Figure 3** *Klb* expression is intact in peripheral tissues of the *Klb* brain knockout models. Male mice of indicated genotypes without (–) or with (Tg21) the Tg(Fgf21) insertion were sacrificed ZT8. *Klb* mRNA was quantified in liver and brown and white adipose of (a) *Camk2a-cre* and (b) *Phox2b-cre* models. Data represent mean ± SEM,  $n = 5–9$ . Ct values shown inside bars. Asterisks indicate significant differences ( $P < 0.05$ ) between Tg21 and (–) control mice.

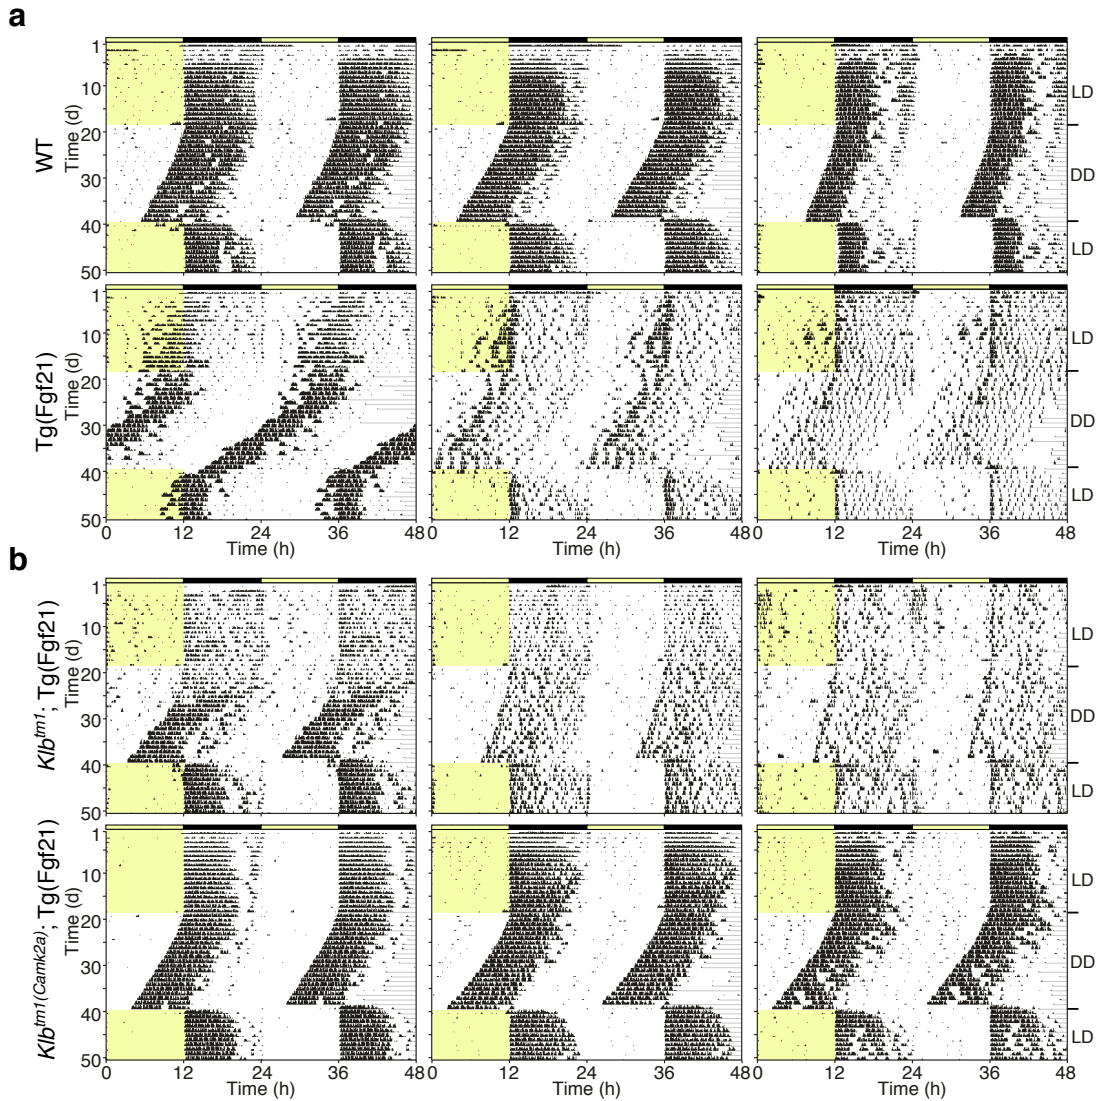

**Supplementary Figure 4** Representative actograms for Tg(Fgf21) mice. Representative actograms are shown double-plotted for three individual **(a)** wild-type (WT) or Tg(Fgf21) male mice, and **(b)**  $Klib^{tm1}::Tg(Fgf21)$  or  $Klib^{tm1(Camk2a)}::Tg(Fgf21)$  male mice (bottom). Time on x-axis refers to zeitgeber time (ZT) 0 at lights on. Yellow indicates light phase (LD, 12 hours light/12 hours dark; DD, constant darkness).

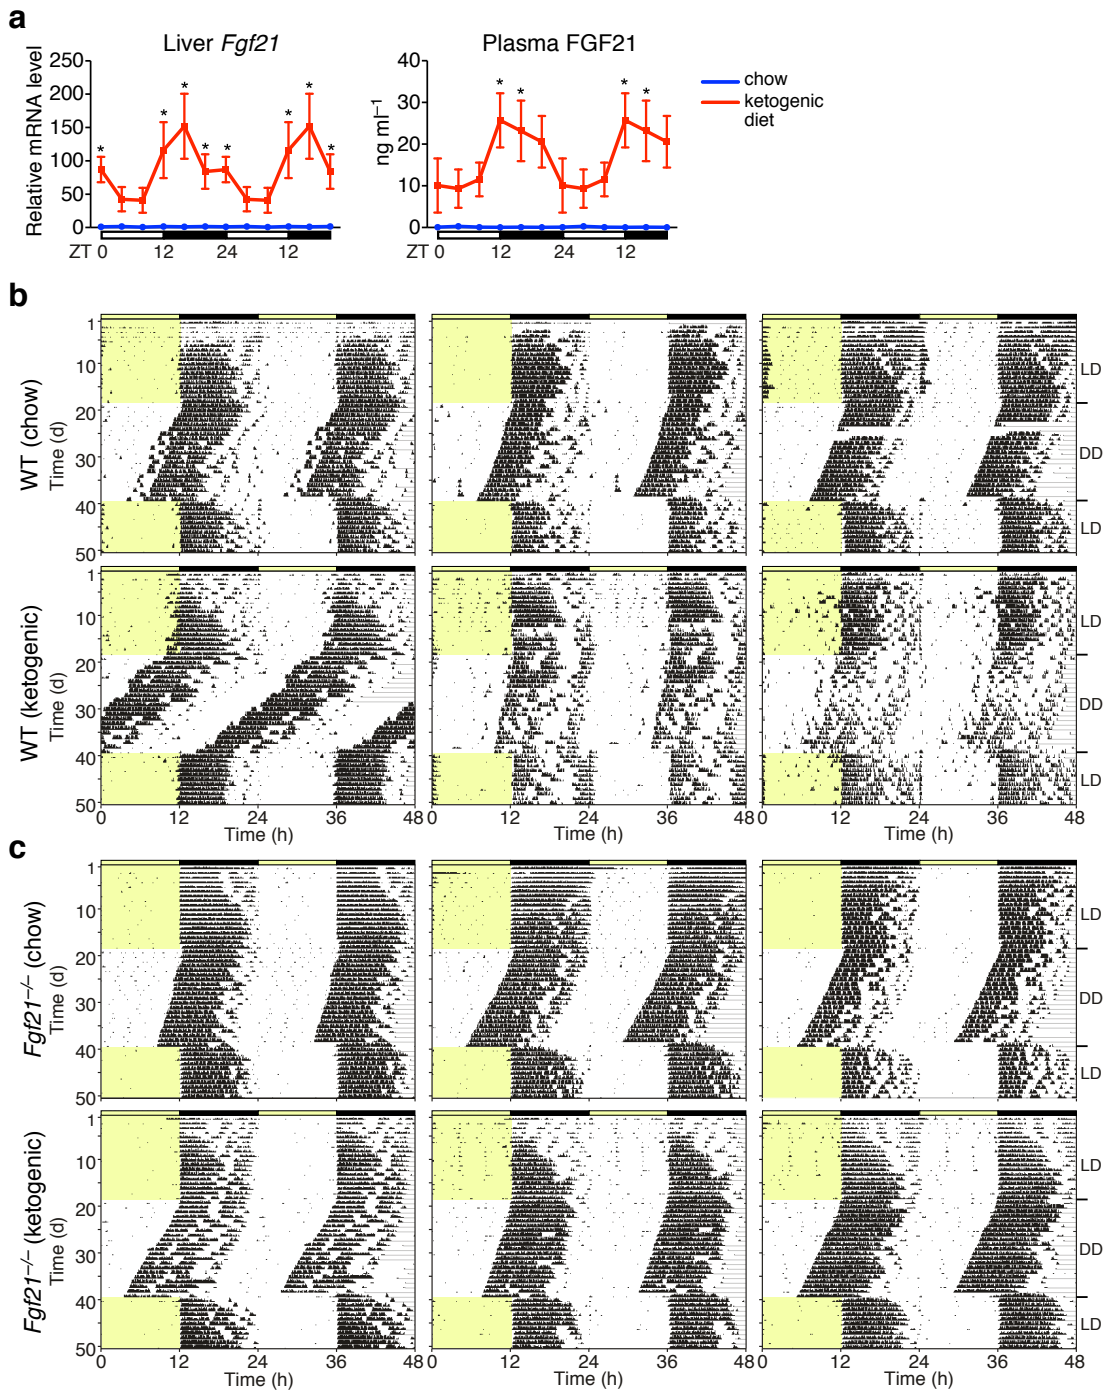

**Supplementary Figure 5** Ketogenic diet mimics transgenic FGF21 overexpression in regulating circadian behavior. **(a)** Hepatic FGF21 mRNA and plasma protein levels in male wild-type mice fed chow or ketogenic diet for 6 weeks. Mice were sacrificed every

4 h over a 24 h period, beginning at the start of the light phase (ZT0). Values on the x-axes are double-plotted; data represent mean  $\pm$  SEM,  $n = 4$ . Asterisks indicate significant differences ( $P < 0.05$ ) between diets. **(b, c)** Representative actograms are shown double-plotted for three individual wild-type males **(b)** fed standard chow or ketogenic diet, and *Fgf21*<sup>-/-</sup> males **(c)** fed standard chow or ketogenic diet. Time on x-axis refers to zeitgeber time (ZT) 0 at lights on. Yellow indicates light phase (LD, 12 hours light/12 hours dark; DD, constant darkness).

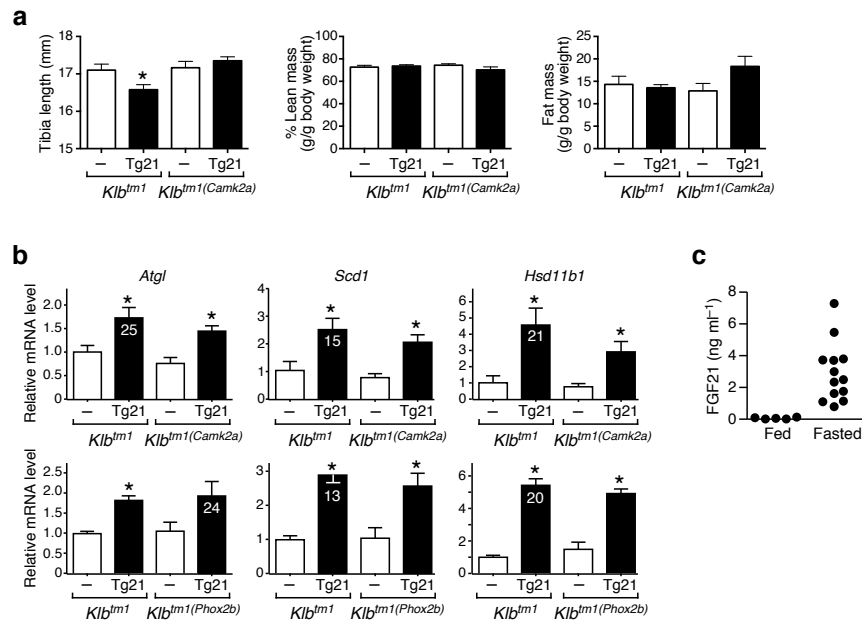

**Supplementary Figure 6** Brain-specific effects of FGF21 on growth morphometry and adipose gene expression. **(a)** Tibia length, lean mass, and fat mass from male mice of indicated genotypes without (-) or with (Tg21) the Tg(Fgf21) insertion ( $n = 4-7$ ). Animals were sacrificed at ZT8. **(b)** White adipose tissue gene expression in brain deletion of *Klb*. Male mice ( $n = 5-9$ ) of indicated genotypes were sacrificed at ZT8. Ct values shown inside bars. Data represent mean  $\pm$  SEM. Asterisks indicate significant differences ( $P < 0.05$ ) between Tg21 and (-) control mice. **(c)** Plasma FGF21 levels in individual 12-week old male C57BL/6J mice at ZT3 fed ad libitum or fasted for 24 h.



**Supplementary Table 1** Metabolic parameters from *Klb<sup>tml(Camk2a)</sup>::Tg(Fgf21)* and *Klb<sup>tml(Phox2b)</sup>::Tg(Fgf21)* mice.

|                                     | <i>Klb<sup>tml</sup></i> | <i>Klb<sup>tml</sup>::</i><br>Tg(Fgf21) | <i>Klb<sup>tml(Camk2a)</sup></i> | <i>Klb<sup>tml(Camk2a)</sup>::</i><br>Tg(Fgf21) |
|-------------------------------------|--------------------------|-----------------------------------------|----------------------------------|-------------------------------------------------|
| <i>n</i>                            | 5                        | 7                                       | 5                                | 7                                               |
| glucose (mg dl <sup>-1</sup> )      | 130.9 ± 4.72             | 126.8 ± 4.69                            | 140.8 ± 9.82                     | 118.9 ± 3.86                                    |
| βhydroxybutyrate (μM)               | 66.29 ± 8.63             | 205.4 ± 44.96*                          | 29.68 ± 9.65                     | 45.38 ± 6.053                                   |
| cholesterol (mg dl <sup>-1</sup> )  | 146.1 ± 13.32            | 112 ± 6.32*                             | 161.1 ± 15.94                    | 153.7 ± 8.67                                    |
| triglycerides (mg d <sup>-1</sup> ) | 50.18 ± 12.72            | 42.13 ± 5.96                            | 55.9 ± 7.24                      | 67.42 ± 13.74                                   |
| FGF21 (ng ml <sup>-1</sup> )        | 0.54 ± 0.09              | 657.4 ± 117.5*                          | 0.75 ± 0.15                      | 737.3 ± 167.4*                                  |

|                                      | <i>Klb<sup>tml</sup></i> | <i>Klb<sup>tml</sup>::</i><br>Tg(Fgf21) | <i>Klb<sup>tml(Phox2b)</sup></i> | <i>Klb<sup>tml(Phox2b)</sup>::</i><br>Tg(Fgf21) |
|--------------------------------------|--------------------------|-----------------------------------------|----------------------------------|-------------------------------------------------|
| <i>n</i>                             | 9                        | 9                                       | 5                                | 8                                               |
| glucose (mg dl <sup>-1</sup> )       | 131.6 ± 3.74             | 119.3 ± 8.67                            | 147.1 ± 5.19                     | 112.4 ± 15.48                                   |
| cholesterol (mg dl <sup>-1</sup> )   | 136.6 ± 10.44            | 104.3 ± 6.20*                           | 128.1 ± 15.30                    | 126.5 ± 5.82                                    |
| triglycerides (mg dl <sup>-1</sup> ) | 46.44 ± 4.08             | 49.08 ± 9.62                            | 59.38 ± 6.59                     | 41.33 ± 6.19                                    |
| FGF21 (ng m <sup>-1</sup> )          | 0.41 ± 0.70              | 784.6 ± 111.1*                          | 1.45 ± 0.85                      | 933.5 ± 228.9*                                  |

Data are presented as mean ± SEM. Asterisks indicate significant differences ( $P < 0.05$ ) compared to controls without Tg(Fgf21). FGF21 measurement was taken at ZT3.

**Supplementary Table 2** Circadian wheel running parameters in *Klb<sup>tm1(Cank2a)</sup>::Tg(Fgf21)* mice.

|                                              | Wild-type chow | Tg(Fgf21) chow |
|----------------------------------------------|----------------|----------------|
| <i>n</i>                                     | 16             | 28             |
| total activity (revs/day × 10 <sup>4</sup> ) | 2.62 ± 0.17    | 1.91 ± 0.19*   |
| % light activity                             | 3.20 ± 0.71    | 13.94 ± 2.95*  |
| % dark activity                              | 96.80 ± 0.71   | 86.06 ± 2.95*  |
| period (h)                                   | 23.62 ± 0.03   | 23.57 ± 0.04   |
| amplitude (%)                                | 17.79 ± 1.49   | 12.14 ± 1.50*  |
| phase (h)                                    | 0.24 ± 0.07    | -0.96 ± 0.37*  |

  

|                                              | <i>Klb<sup>tm1</sup>::Tg(Fgf21)</i> | <i>Klb<sup>tm1(Cank2a)</sup>::Tg(Fgf21)</i> |
|----------------------------------------------|-------------------------------------|---------------------------------------------|
| <i>n</i>                                     | 11                                  | 12                                          |
| total activity (revs/day × 10 <sup>4</sup> ) | 0.97 ± 0.22                         | 2.60 ± 0.16*                                |
| % light activity                             | 15.26 ± 3.72                        | 1.87 ± 0.36*                                |
| % dark activity                              | 84.74 ± 3.72                        | 98.13 ± 0.36*                               |
| period (h)                                   | 23.58 ± 0.05                        | 23.54 ± 0.02                                |
| amplitude (%)                                | 7.82 ± 2.03                         | 17.31 ± 1.29*                               |
| phase (h)                                    | 0.13 ± 0.16                         | 0.35 ± 0.06                                 |

Data are presented as mean ± SEM. Asterisks indicate significant differences ( $P < 0.05$ ) compared to wild-type or *Klb<sup>tm1</sup>::Tg(Fgf21)* controls.

**Supplementary Table 3** Circadian wheel running parameters and plasma FGF21 in wild-type versus *Fgf21<sup>-/-</sup>* mice.

|                                              | Wild-type chow | Wild-type ketogenic | <i>Fgf21<sup>-/-</sup></i> chow | <i>Fgf21<sup>-/-</sup></i> ketogenic |
|----------------------------------------------|----------------|---------------------|---------------------------------|--------------------------------------|
| <i>n</i>                                     | 6              | 24                  | 18                              | 23                                   |
| total activity (revs/day × 10 <sup>4</sup> ) | 3.39 ± 0.18    | 1.86 ± 0.12*        | 2.87 ± 0.20                     | 2.14 ± 0.12*                         |
| % light activity                             | 3.48 ± 1.54    | 8.78 ± 1.47*        | 1.81 ± 0.53†                    | 3.84 ± 0.76                          |
| % dark activity                              | 96.52 ± 1.54   | 91.23 ± 1.47*       | 98.19 ± 0.53†                   | 96.16 ± 0.76                         |
| period (h)                                   | 23.69 ± 0.02   | 23.62 ± 0.04        | 23.62 ± 0.03                    | 23.64 ± 0.05                         |
| amplitude (%)                                | 17.32 ± 2.37   | 15.41 ± 1.41        | 19.77 ± 1.06                    | 19.43 ± 1.48                         |
| phase (h)                                    | 0.38 ± 0.20    | -0.53 ± 0.24        | 0.52 ± 0.06                     | 0.03 ± 0.16*                         |
| Plasma FGF21 (ng ml <sup>-1</sup> )          | 0.44 ± 0.0     | 21.92 ± 5.45*       | undetectable                    | undetectable                         |

Data are presented as mean ± SEM. Asterisks indicate significant differences ( $P < 0.05$ ) compared to chow-fed mice. Daggers indicate significant differences ( $P < 0.05$ ) compared to all other groups. FGF21 measurement was taken at ZT8.

**Supplementary Table 4** List of nuclei collected for expression profiling.

| Nucleus | Paxinos & Franklin Atlas <sup>31</sup> Level | Full Name                                                                            |
|---------|----------------------------------------------|--------------------------------------------------------------------------------------|
| CTX     | 40-41                                        | cortex                                                                               |
| Thal AD | 39-40                                        | anterodorsal thalamic nucleus                                                        |
| OVLT    | 27                                           | vascular organ of lamina terminalis                                                  |
| MnPO    | 27                                           | median preoptic nucleus                                                              |
| SCN     | 34-38                                        | suprachiasmatic nucleus                                                              |
| PVH     | 37-41                                        | paraventricular hypothalamic nucleus                                                 |
| RCN     | 39-40                                        | retrochiasmatic nucleus                                                              |
| LHA1    | 39                                           | lateral hypothalamic area to paraventricular hypothalamic nucleus                    |
| dmVMH   | 42-46                                        | dorsomedial ventromedial hypothalamic nucleus                                        |
| vVMH    | 42-46                                        | ventrolateral ventromedial hypothalamic nucleus                                      |
| ARC     | 42-46                                        | arcuate nucleus                                                                      |
| cDMH    | 47-48                                        | compact dorsomedial hypothalamic nucleus                                             |
| vDMH    | 47-48                                        | ventral dorsomedial hypothalamic nucleus                                             |
| LHA2    | 47                                           | lateral hypothalamic area to dorsomedial hypothalamic nucleus plus perifornical area |
| PH      | 51                                           | posterior hypothalamic area                                                          |
| PMV     | 51-53                                        | pre mammillary nucleus, ventral part                                                 |
| VTA     | 61                                           | caudal ventral tegmental area                                                        |
| mPBN    | 74-75                                        | medial parabrachial nucleus                                                          |
| lPBN    | 74-75                                        | lateral parabrachial nucleus                                                         |
| AP      | 92-93                                        | area postrema                                                                        |
| DMV (X) | 92-93                                        | dorsal motor nucleus of the vagus (Xth cranial nerve)                                |
| NTS     | 92-93                                        | nucleus tractus solitarius                                                           |
| nodose  |                                              | left nodose ganglion; cell body of vagal sensory neurons                             |
| DRG     |                                              | mid-lower thoracic dorsal root ganglia (T7-T12)                                      |
